# Supplementary material for: DNA nanopores as artificial membrane channels for bioprotonics
Source: PubMed Central journal article supplement (PMC10477224; doi:10.1038/s41467-023-40870-1), 2023-09-04
Supplement: 41467_2023_40870_MOESM3_ESM.pdf [file 41467_2023_40870_MOESM3_ESM.pdf]

## **Description of Additional Supplementary Files**

1. File Name: Supplementary Data 1

Legend: DNA oligo sequences
